# Supplementary material for: TNF-α and TGF-β Counter-Regulate PD-L1 Expression on Monocytes in Systemic Lupus Erythematosus
Source: PubMed Central journal article supplement — Sci Rep. 2012 Mar 2;2:295. doi: 10.1038/srep00295 (PMC3291882; doi:10.1038/srep00295), 2012-03-02
Supplement: srep00295-s1.pdf [file srep00295-s1.pdf]

**TNF- $\alpha$  and TGF- $\beta$  Counter-Regulate PD-L1 Expression on Monocytes in Systemic Lupus Erythematosus**

Jing-Ni Ou<sup>1</sup>, Alice E. Wiedeman<sup>2</sup>, and Anne M. Stevens<sup>1,3,\*</sup>

<sup>1</sup>Seattle Children's Research Institute, <sup>2</sup>Department of Immunology, <sup>3</sup>Department of Pediatrics,  
University of Washington, Seattle, WA

\*Correspondence and requests for materials should be addressed to **Anne M. Stevens MD, PhD**

University of Washington Department of Pediatrics

1959 NE Pacific St, Health Sciences Bldg.

Seattle, WA 98195-6320

Telephone: (206) 987-7313

FAX: (206) 987-7310

Email: [amsteve@u.washington.edu](mailto:amsteve@u.washington.edu)

# S. Figure-1:

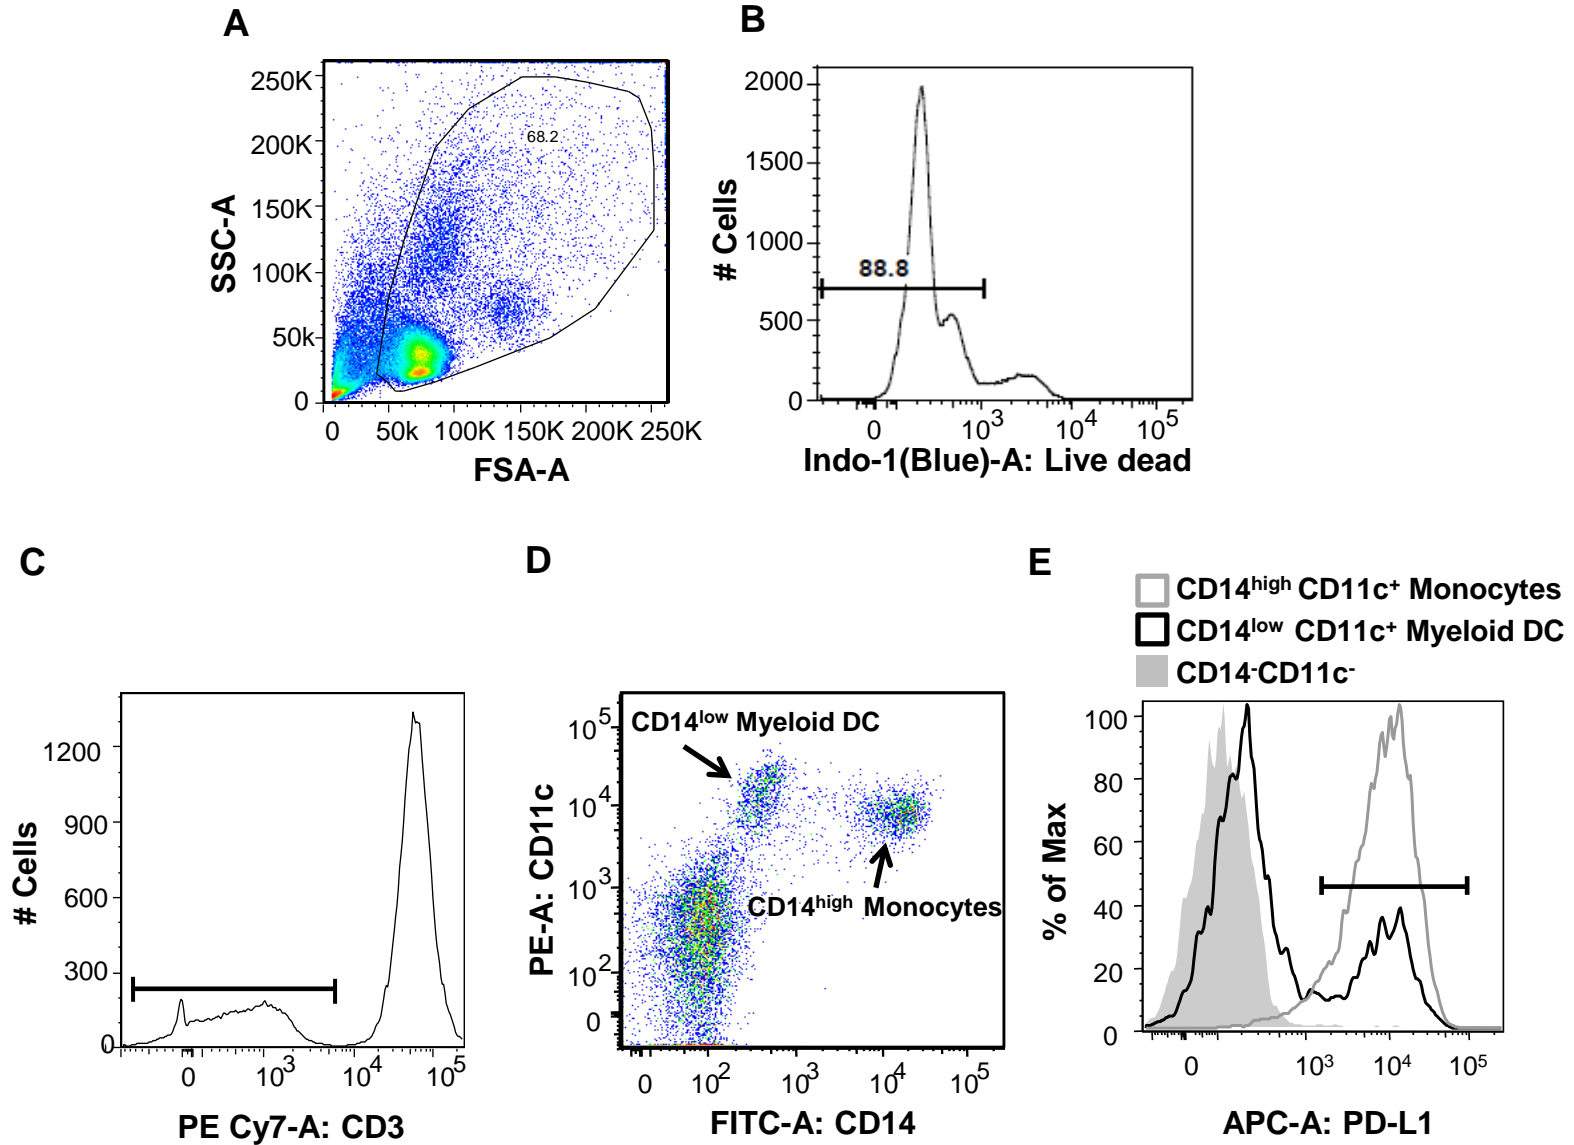

**Supplemental Figure 1. Gating strategy to assay PD-L1 expression on CD14<sup>+</sup> monocytes and myeloid dendritic cells.** **A**, A forward and side scatter plot was used to identify leukocyte subpopulations. **B**, Cell viability was determined by LIVE/DEAD staining. **C**, Myeloid cells were differentiated from T lymphocytes by CD3 staining. **D**, Phenotyping analyses segregate CD3<sup>-</sup> cells into monocytes (CD3<sup>-</sup>CD14<sup>high</sup>CD11c<sup>+</sup>), and myeloid DC (CD3<sup>-</sup>CD14<sup>low</sup>CD11c<sup>+</sup>). **E**, Representative cytometry histogram shows PD-L1 expression was induced on myeloid DC and monocytes. The background PD-L1 expression is represented by CD14<sup>-</sup>CD11c<sup>-</sup> cells.

# S. Figure-2

**A**

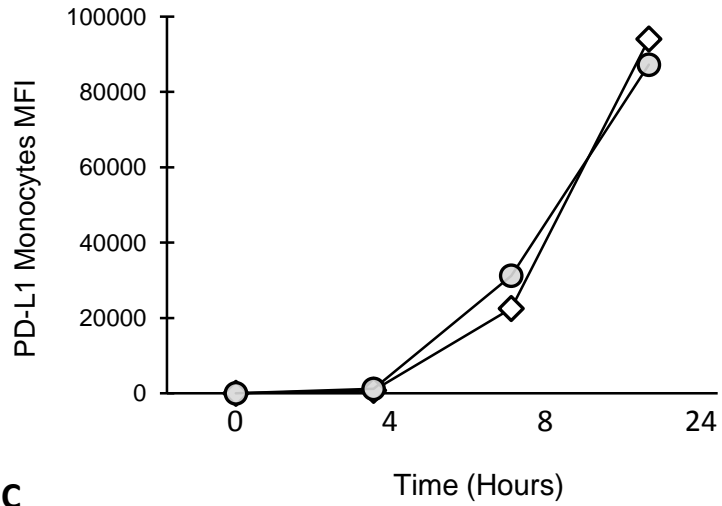

**B**

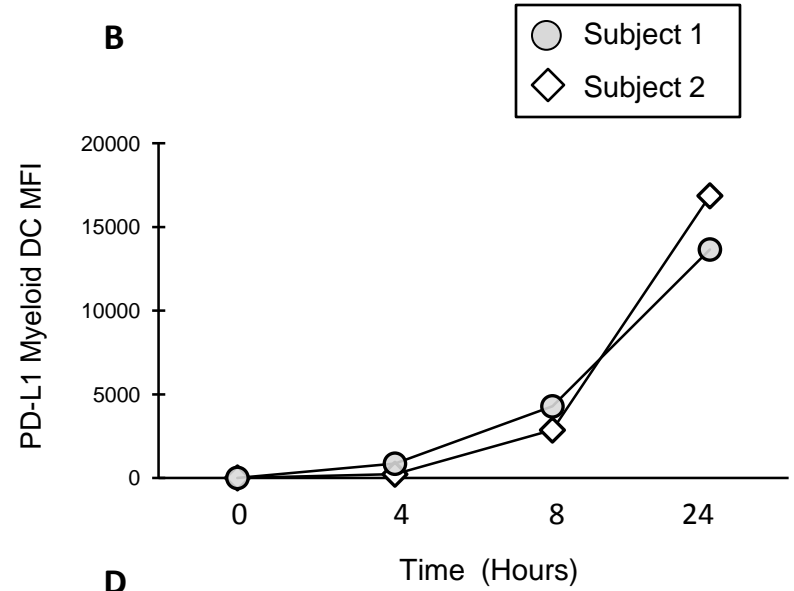

**C**

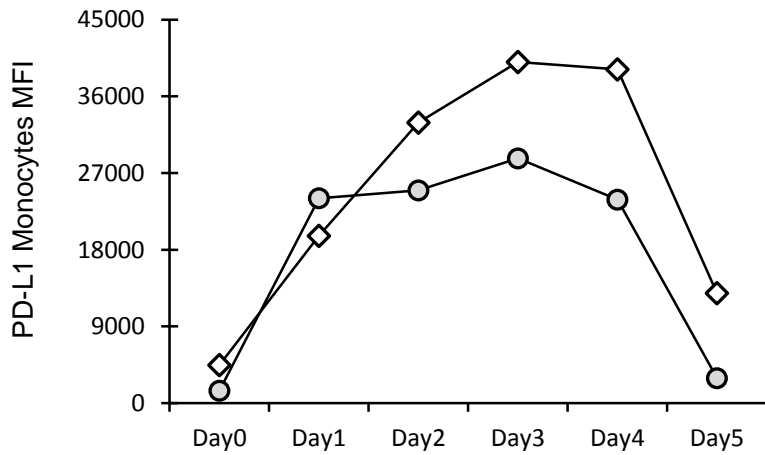

**D**

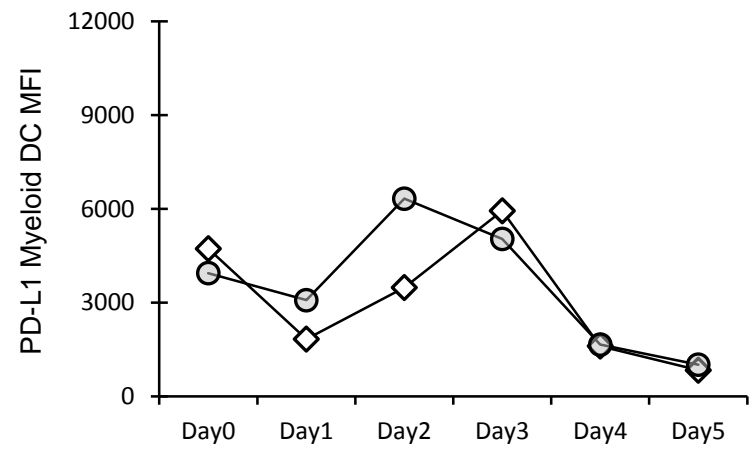

**Supplemental Figure 2. Time course of PD-L1 surface protein expression *ex vivo*.** PBMC were cultured over 24 hours without stimulation. PD-L1 protein expression was assayed by flow cytometry at indicated time point. **A**, PD-L1 mean fluorescence intensity (MFI) on monocytes (CD3<sup>-</sup>CD14<sup>high</sup>CD11c<sup>+</sup>); **B**, PD-L1 expression on myeloid DC (CD3<sup>-</sup>CD14<sup>low</sup>CD11c<sup>+</sup>), subtracting background (CD3<sup>-</sup>CD14<sup>-</sup>CD11c<sup>-</sup>) MFI. Expression of PD-L1 in cultured PBMC from two healthy subjects over a five day time course. **C**, PD-L1 MFI on monocytes; **D**, PD-L1 expression on myeloid DC, subtracting background MFI.
